# Supplementary material for: Antifungal Effect of Penicillamine Due to the Selective Targeting of L-Homoserine O-Acetyltransferase
Source: MDPI journal article supplement (doi:10.3390/ijms23147763), 2022-07-14
Supplement: s1 [file s1]

# Antifungal effect of Penicillamine due to the selective targeting of L-homoserine O-acetyltransferase

Aleksandra Kuplińska, Kamila Rząd, Marek Wojciechowski, Sławomir Milewski and Iwona Gabriel\*

Department of Pharmaceutical Technology and Biochemistry, Gdansk University of Technology, Gdansk, Poland; aleksandra.kuplinska@pg.edu.pl (A.K.); kamila.rzad@pg.edu.pl (K.R.); marek.wojciechowski@pg.edu.pl (M.W.); slawomir.milewski@pg.edu.pl (S.M.); iwona.gabriel@pg.edu.pl (I.G.) \* Correspondence: iwona.gabriel@pg.edu.pl (I.G.); Tel.: +48-58-348-6078 ; Fax: +48-58-347-1144

## Table of contents:

|                                                                                                                           |   |
|---------------------------------------------------------------------------------------------------------------------------|---|
| 1. The multiple sequence alignment of amino acids sequences from 60 microorganisms from the <i>Ascomycota</i> group ..... | 2 |
| 2. Phylogenetic tree of amino acid sequences from 60 microorganisms from the <i>Ascomycota</i> group .....                | 7 |
| 3. Conservation of characteristic amino acid motifs in L-homoserine O-acetyltransferase sequences.....                    | 8 |
| 4. Overproduction of <i>CaMet2p</i> and <i>CaMet2NHp</i> in <i>E. coli</i> cells.....                                     | 8 |
| 5. SDS-PAGE or Western blot analysis of enzymes overproduction and purification.....                                      | 9 |
| 6. Phylogenetic tree of <i>Met2p</i> from various organisms.....                                                          | 9 |
| 7. References.....                                                                                                        | 9 |

|                                    |                    | 1               | 10                 | 20             | 30         |
|------------------------------------|--------------------|-----------------|--------------------|----------------|------------|
| <i>Candida albicans</i>            | ref XP_718283.1    | MT.....YKDV     | TEEQLO..INPYVKLVPG | QIVPEPVTLE     |            |
| <i>Candida dubliniensis</i>        | ref XP_002421791.1 | MT.....YKDV     | TEEQLO..INPYVKLVPG | QIVPEPVTLE     |            |
| <i>Candida tropicalis</i>          | ref XP_002546119.1 | MT.....YKDV     | TEEQLO..INPYVKLVPG | QIVPEPVTLE     |            |
| <i>Candida orthopositii</i>        | ref XP_00385973.1  | MT.....YKDV     | TEEQLO..INPYVKLVPG | QIVPEPVTLE     |            |
| <i>Candida parapsilosis</i>        | ref XP_036664758.1 | MT.....YKDV     | TEEQLO..INPYVKLVPG | QIVPEPVTLE     |            |
| <i>Candida maltosa</i>             | ref EMG48875.1     | MT.....YKDV     | TEEQLO..INPYVKLVPG | QIVPEPVTLE     |            |
| <i>Suhomyces tanzawaensis</i>      | ref XP_020067300.1 | MT.....YKDV     | TEEQLO..INPYVKLVPG | QIVPEPVTLE     |            |
| <i>Candida metapsilosis</i>        | ref KAG5420916.1   | MT.....YKDV     | TEEQLO..INPYVKLVPG | QIVPEPVTLE     |            |
| <i>Candida subhashii</i>           | ref KAG7662799.1   | MT.....YKDV     | TEEQLO..INPYVKLVPG | QIVPEPVTLE     |            |
| <i>Scheffersomyces stipitis</i>    | ref XP_001383339.1 | MT.....YKDV     | TEEQLO..INPYVKLVPG | QIVPEPVTLE     |            |
| <i>Yamadazyma tenuis</i>           | ref XP_006685252.1 | MT.....YKDV     | TEEQLO..INPYVKLVPG | QIVPEPVTLE     |            |
| <i>Spathaspora passalidarum</i>    | ref XP_007374001.1 | MT.....YKDV     | TEEQLO..INPYVKLVPG | QIVPEPVTLE     |            |
| <i>Dutina rugosa</i>               | ref XP_034010932.1 | MT.....YKDV     | TEEQLO..INPYVKLVPG | QIVPEPVTLE     |            |
| <i>Millerozyma farinosa</i>        | emb CCB85520.1     | MT.....YKDV     | TEEQLO..INPYVKLVPG | QIVPEPVTLE     |            |
| <i>Debaryomyces fabryi</i>         | ref XP_015466149.1 | MT.....YKDV     | TEEQLO..INPYVKLVPG | QIVPEPVTLE     |            |
| <i>Debaryomyces hansenii</i>       | ref XP_460331.1    | MT.....YKDV     | TEEQLO..INPYVKLVPG | QIVPEPVTLE     |            |
| <i>Candida viswanathii</i>         | ref RCK59094.1     | MT.....YKDV     | TEEQLO..INPYVKLVPG | QIVPEPVTLE     |            |
| <i>Hyphopichia burtonii</i>        | ref XP_020074237.1 | MT.....YKDV     | TEEQLO..INPYVKLVPG | QIVPEPVTLE     |            |
| <i>Candida auris</i>               | ref P1551135.1     | MT.....YKDV     | TEEQLO..INPYVKLVPG | QIVPEPVTLE     |            |
| <i>Clavispora lusitanae</i>        | ref KAF5210728.1   | MT.....YKDV     | TEEQLO..INPYVKLVPG | QIVPEPVTLE     |            |
| <i>Scheffersomyces spartinae</i>   | ref XP_043049351.1 | MT.....YKDV     | TEEQLO..INPYVKLVPG | QIVPEPVTLE     |            |
| <i>Zygosaccharomyces parabolii</i> | ref AGZ18953.1     | MT.....YKDV     | TEEQLO..INPYVKLVPG | QIVPEPVTLE     |            |
| <i>Zygosaccharomyces bailii</i>    | emb SJM88098.1     | MT.....YKDV     | TEEQLO..INPYVKLVPG | QIVPEPVTLE     |            |
| <i>Kluyveromyces marxianus</i>     | ref KAG0681669.1   | MT.....YKDV     | TEEQLO..INPYVKLVPG | QIVPEPVTLE     |            |
| <i>Kluyveromyces lactis</i>        | ref QEU60244.1     | MT.....YKDV     | TEEQLO..INPYVKLVPG | QIVPEPVTLE     |            |
| <i>Terfezia boudieri</i>           | ref RFB22791.1     | MT.....YKDV     | TEEQLO..INPYVKLVPG | QIVPEPVTLE     |            |
| <i>Trimausa ulvea</i>              | ref KAF8420454.1   | MT.....YKDV     | TEEQLO..INPYVKLVPG | QIVPEPVTLE     |            |
| <i>Kalaharihuber piefilii</i>      | ref KAF8471959.1   | MT.....YKDV     | TEEQLO..INPYVKLVPG | QIVPEPVTLE     |            |
| <i>Terfezia clavervii</i>          | ref KAF8455951.1   | MT.....YKDV     | TEEQLO..INPYVKLVPG | QIVPEPVTLE     |            |
| <i>Nannozyma castellii</i>         | ref XP_003673005.1 | MT.....YKDV     | TEEQLO..INPYVKLVPG | QIVPEPVTLE     |            |
| <i>Pachysolen tanophyllus</i>      | ref XP_020074237.1 | MT.....YKDV     | TEEQLO..INPYVKLVPG | QIVPEPVTLE     |            |
| <i>Wickerhamomyces ciferrii</i>    | ref XP_011272307.1 | MT.....YKDV     | TEEQLO..INPYVKLVPG | QIVPEPVTLE     |            |
| <i>Lachancea dasiensis</i>         | emb SCU96634.1     | MT.....YKDV     | TEEQLO..INPYVKLVPG | QIVPEPVTLE     |            |
| <i>Lipomyces starkeyi</i>          | ref ODQ74338.1     | MT.....YKDV     | TEEQLO..INPYVKLVPG | QIVPEPVTLE     |            |
| <i>Saitoella complicata</i>        | ref GAG051702.1    | MT.....YKDV     | TEEQLO..INPYVKLVPG | QIVPEPVTLE     |            |
| <i>Torulopsis globosa</i>          | ref XP_037137900.1 | MT.....YKDV     | TEEQLO..INPYVKLVPG | QIVPEPVTLE     |            |
| <i>Ascoidea rubescens</i>          | ref XP_020048617.1 | MT.....YKDV     | TEEQLO..INPYVKLVPG | QIVPEPVTLE     |            |
| <i>Ogataea philodendri</i>         | ref XP_046063080.1 | MT.....YKDV     | TEEQLO..INPYVKLVPG | QIVPEPVTLE     |            |
| <i>Lachancea nollifagi</i>         | emb SCV03058.1     | MT.....YKDV     | TEEQLO..INPYVKLVPG | QIVPEPVTLE     |            |
| <i>Eremothecium gossypii</i>       | ref NP_986230.1    | MT.....YKDV     | TEEQLO..INPYVKLVPG | QIVPEPVTLE     |            |
| <i>Trichomonascus ciferrii</i>     | ref KAA8897105.1   | MT.....YKDV     | TEEQLO..INPYVKLVPG | QIVPEPVTLE     |            |
| <i>Autographum hederace</i>        | ref KAF1990932.1   | MT.....YKDV     | TEEQLO..INPYVKLVPG | QIVPEPVTLE     |            |
| <i>Lachancea lanzarotensis</i>     | ref XP_022630543.1 | MT.....YKDV     | TEEQLO..INPYVKLVPG | QIVPEPVTLE     |            |
| <i>Cyberlindnera fabianii</i>      | emb CDR47813.1     | MT.....YKDV     | TEEQLO..INPYVKLVPG | QIVPEPVTLE     |            |
| <i>Wickerhamiella sorbophila</i>   | ref XP_024662504.1 | MT.....YKDV     | TEEQLO..INPYVKLVPG | QIVPEPVTLE     |            |
| <i>Lophiostoma macrostromum</i>    | ref KAF2652156.1   | MT.....YKDV     | TEEQLO..INPYVKLVPG | QIVPEPVTLE     |            |
| <i>Sphaeroporella brunnea</i>      | ref KAA8892634.1   | MT.....YKDV     | TEEQLO..INPYVKLVPG | QIVPEPVTLE     |            |
| <i>Ramularia collo-cygni</i>       | ref XP_023631861.1 | MT.....YKDV     | TEEQLO..INPYVKLVPG | QIVPEPVTLE     |            |
| <i>Eremomyces bilateralis</i>      | ref XP_033534262.1 | MT.....YKDV     | TEEQLO..INPYVKLVPG | QIVPEPVTLE     |            |
| <i>Coleophoma crateriformis</i>    | ref RDW64025.1     | MT.....YKDV     | TEEQLO..INPYVKLVPG | QIVPEPVTLE     |            |
| <i>Penicillium rolfii</i>          | ref KAF3396381.1   | MT.....YKDV     | TEEQLO..INPYVKLVPG | QIVPEPVTLE     |            |
| <i>Amorphotheca resinacea</i>      | ref XP_024718197.1 | MT.....YKDV     | TEEQLO..INPYVKLVPG | QIVPEPVTLE     |            |
| <i>Chalara longipes</i>            | ref KAE3970763.1   | MT.....YKDV     | TEEQLO..INPYVKLVPG | QIVPEPVTLE     |            |
| <i>Aspergillus terreus</i>         | ref KAG2412800.1   | MT.....YKDV     | TEEQLO..INPYVKLVPG | QIVPEPVTLE     |            |
| <i>Aspergillus nidulans</i>        | ref XP_026603423.1 | MT.....YKDV     | TEEQLO..INPYVKLVPG | QIVPEPVTLE     |            |
| <i>Hyaloscypha variabilis</i>      | ref PMD46603.1     | MT.....YKDV     | TEEQLO..INPYVKLVPG | QIVPEPVTLE     |            |
| <i>Talaromyces marneffii</i>       | ref XP_002145444.1 | MT.....YKDV     | TEEQLO..INPYVKLVPG | QIVPEPVTLE     |            |
| <i>Aspergillus phoenicis</i>       | ref RDK39989.1     | MT.....YKDV     | TEEQLO..INPYVKLVPG | QIVPEPVTLE     |            |
| <i>Aspergillus niger</i>           | ref XP_001398292.1 | MT.....YKDV     | TEEQLO..INPYVKLVPG | QIVPEPVTLE     |            |
| <i>Trichodeltschia bisporula</i>   | ref KAF2400853.1   | MT.....YKDV     | TEEQLO..INPYVKLVPG | QIVPEPVTLE     |            |
| <i>Candida albicans</i>            | ref XP_718283.1    | CGEILHNFPYAYKTI | GRNDEAKNVLVIGHAL   | TGSSDVQDWWGGLG | .....DRAFD |
| <i>Candida dubliniensis</i>        | ref XP_002421791.1 | CGEILHNFPYAYKTI | GRNDEAKNVLVIGHAL   | TGSSDVQDWWGGLG | .....DRAFD |
| <i>Candida tropicalis</i>          | ref XP_002546119.1 | CGEILHNFPYAYKTI | GRNDEAKNVLVIGHAL   | TGSSDVQDWWGGLG | .....DRAFD |
| <i>Candida orthopositii</i>        | ref XP_00385973.1  | CGEILHNFPYAYKTI | GRNDEAKNVLVIGHAL   | TGSSDVQDWWGGLG | .....DRAFD |
| <i>Candida parapsilosis</i>        | ref XP_036664758.1 | CGEILHNFPYAYKTI | GRNDEAKNVLVIGHAL   | TGSSDVQDWWGGLG | .....DRAFD |
| <i>Candida maltosa</i>             | ref EMG48875.1     | CGEILHNFPYAYKTI | GRNDEAKNVLVIGHAL   | TGSSDVQDWWGGLG | .....DRAFD |
| <i>Suhomyces tanzawaensis</i>      | ref XP_020067300.1 | CGEILHNFPYAYKTI | GRNDEAKNVLVIGHAL   | TGSSDVQDWWGGLG | .....DRAFD |
| <i>Candida metapsilosis</i>        | ref KAG5420916.1   | CGEILHNFPYAYKTI | GRNDEAKNVLVIGHAL   | TGSSDVQDWWGGLG | .....DRAFD |
| <i>Candida subhashii</i>           | ref KAG7662799.1   | CGEILHNFPYAYKTI | GRNDEAKNVLVIGHAL   | TGSSDVQDWWGGLG | .....DRAFD |
| <i>Scheffersomyces stipitis</i>    | ref XP_001383339.1 | CGEILHNFPYAYKTI | GRNDEAKNVLVIGHAL   | TGSSDVQDWWGGLG | .....DRAFD |
| <i>Yamadazyma tenuis</i>           | ref XP_006685252.1 | CGEILHNFPYAYKTI | GRNDEAKNVLVIGHAL   | TGSSDVQDWWGGLG | .....DRAFD |
| <i>Spathaspora passalidarum</i>    | ref XP_007374001.1 | CGEILHNFPYAYKTI | GRNDEAKNVLVIGHAL   | TGSSDVQDWWGGLG | .....DRAFD |
| <i>Dutina rugosa</i>               | ref XP_034010932.1 | CGEILHNFPYAYKTI | GRNDEAKNVLVIGHAL   | TGSSDVQDWWGGLG | .....DRAFD |
| <i>Millerozyma farinosa</i>        | emb CCB85520.1     | CGEILHNFPYAYKTI | GRNDEAKNVLVIGHAL   | TGSSDVQDWWGGLG | .....DRAFD |
| <i>Debaryomyces fabryi</i>         | ref XP_015466149.1 | CGEILHNFPYAYKTI | GRNDEAKNVLVIGHAL   | TGSSDVQDWWGGLG | .....DRAFD |
| <i>Debaryomyces hansenii</i>       | ref XP_460331.1    | CGEILHNFPYAYKTI | GRNDEAKNVLVIGHAL   | TGSSDVQDWWGGLG | .....DRAFD |
| <i>Candida viswanathii</i>         | ref RCK59094.1     | CGEILHNFPYAYKTI | GRNDEAKNVLVIGHAL   | TGSSDVQDWWGGLG | .....DRAFD |
| <i>Hyphopichia burtonii</i>        | ref XP_020074237.1 | CGEILHNFPYAYKTI | GRNDEAKNVLVIGHAL   | TGSSDVQDWWGGLG | .....DRAFD |
| <i>Candida auris</i>               | ref P1551135.1     | CGEILHNFPYAYKTI | GRNDEAKNVLVIGHAL   | TGSSDVQDWWGGLG | .....DRAFD |
| <i>Clavispora lusitanae</i>        | ref KAF5210728.1   | CGEILHNFPYAYKTI | GRNDEAKNVLVIGHAL   | TGSSDVQDWWGGLG | .....DRAFD |
| <i>Scheffersomyces spartinae</i>   | ref XP_043049351.1 | CGEILHNFPYAYKTI | GRNDEAKNVLVIGHAL   | TGSSDVQDWWGGLG | .....DRAFD |
| <i>Zygosaccharomyces parabolii</i> | ref AGZ18953.1     | CGEILHNFPYAYKTI | GRNDEAKNVLVIGHAL   | TGSSDVQDWWGGLG | .....DRAFD |
| <i>Zygosaccharomyces bailii</i>    | emb SJM88098.1     | CGEILHNFPYAYKTI | GRNDEAKNVLVIGHAL   | TGSSDVQDWWGGLG | .....DRAFD |
| <i>Kluyveromyces marxianus</i>     | ref KAG0681669.1   | CGEILHNFPYAYKTI | GRNDEAKNVLVIGHAL   | TGSSDVQDWWGGLG | .....DRAFD |
| <i>Kluyveromyces lactis</i>        | ref QEU60244.1     | CGEILHNFPYAYKTI | GRNDEAKNVLVIGHAL   | TGSSDVQDWWGGLG | .....DRAFD |
| <i>Terfezia boudieri</i>           | ref RFB22791.1     | CGEILHNFPYAYKTI | GRNDEAKNVLVIGHAL   | TGSSDVQDWWGGLG | .....DRAFD |
| <i>Trimausa ulvea</i>              | ref KAF8420454.1   | CGEILHNFPYAYKTI | GRNDEAKNVLVIGHAL   | TGSSDVQDWWGGLG | .....DRAFD |
| <i>Kalaharihuber piefilii</i>      | ref KAF8471959.1   | CGEILHNFPYAYKTI | GRNDEAKNVLVIGHAL   | TGSSDVQDWWGGLG | .....DRAFD |
| <i>Terfezia clavervii</i>          | ref KAF8455951.1   | CGEILHNFPYAYKTI | GRNDEAKNVLVIGHAL   | TGSSDVQDWWGGLG | .....DRAFD |
| <i>Nannozyma castellii</i>         | ref XP_003673005.1 | CGEILHNFPYAYKTI | GRNDEAKNVLVIGHAL   | TGSSDVQDWWGGLG | .....DRAFD |
| <i>Pachysolen tanophyllus</i>      | ref XP_020074237.1 | CGEILHNFPYAYKTI | GRNDEAKNVLVIGHAL   | TGSSDVQDWWGGLG | .....DRAFD |
| <i>Wickerhamomyces ciferrii</i>    | ref XP_011272307.1 | CGEILHNFPYAYKTI | GRNDEAKNVLVIGHAL   | TGSSDVQDWWGGLG | .....DRAFD |
| <i>Lachancea dasiensis</i>         | emb SCU96634.1     | CGEILHNFPYAYKTI | GRNDEAKNVLVIGHAL   | TGSSDVQDWWGGLG | .....DRAFD |
| <i>Lipomyces starkeyi</i>          | ref ODQ74338.1     | CGEILHNFPYAYKTI | GRNDEAKNVLVIGHAL   | TGSSDVQDWWGGLG | .....DRAFD |
| <i>Saitoella complicata</i>        | ref GAG051702.1    | CGEILHNFPYAYKTI | GRNDEAKNVLVIGHAL   | TGSSDVQDWWGGLG | .....DRAFD |
| <i>Torulopsis globosa</i>          | ref XP_037137900.1 | CGEILHNFPYAYKTI | GRNDEAKNVLVIGHAL   | TGSSDVQDWWGGLG | .....DRAFD |
| <i>Ascoidea rubescens</i>          | ref XP_020048617.1 | CGEILHNFPYAYKTI | GRNDEAKNVLVIGHAL   | TGSSDVQDWWGGLG | .....DRAFD |
| <i>Ogataea philodendri</i>         | ref XP_046063080.1 | CGEILHNFPYAYKTI | GRNDEAKNVLVIGHAL   | TGSSDVQDWWGGLG | .....DRAFD |
| <i>Lachancea nollifagi</i>         | emb SCV03058.1     | CGEILHNFPYAYKTI | GRNDEAKNVLVIGHAL   | TGSSDVQDWWGGLG | .....DRAFD |
| <i>Eremothecium gossypii</i>       | ref NP_986230.1    | CGEILHNFPYAYKTI | GRNDEAKNVLVIGHAL   | TGSSDVQDWWGGLG | .....DRAFD |
| <i>Trichomonascus ciferrii</i>     | ref KAA8897105.1   | CGEILHNFPYAYKTI | GRNDEAKNVLVIGHAL   | TGSSDVQDWWGGLG | .....DRAFD |
| <i>Autographum hederace</i>        | ref KAF1990932.1   | CGEILHNFPYAYKTI | GRNDEAKNVLVIGHAL   | TGSSDVQDWWGGLG | .....DRAFD |
| <i>Lachancea lanzarotensis</i>     | ref XP_022630543.1 | CGEILHNFPYAYKTI | GRNDEAKNVLVIGHAL   | TGSSDVQDWWGGLG | .....DRAFD |
| <i>Cyberlindnera fabianii</i>      | emb CDR47813.1     | CGEILHNFPYAYKTI | GRNDEAKNVLVIGHAL   | TGSSDVQDWWGGLG | .....DRAFD |
| <i>Wickerhamiella sorbophila</i>   | ref XP_024662504.1 | CGEILHNFPYAYKTI | GRNDEAKNVLVIGHAL   | TGSSDVQDWWGGLG | .....DRAFD |
| <i>Lophiostoma macrostromum</i>    | ref KAF2652156.1   | CGEILHNFPYAYKTI | GRNDEAKNVLVIGHAL   | TGSSDVQDWWGGLG | .....DRAFD |
| <i>Sphaeroporella brunnea</i>      | ref KAA8892634.1   | CGEILHNFPYAYKTI | GRNDEAKNVLVIGHAL   | TGSSDVQDWWGGLG | .....DRAFD |
| <i>Ramularia collo-cygni</i>       | ref XP_023631861.1 | CGEILHNFPYAYKTI | GRNDEAKNVLVIGHAL   | TGSSDVQDWWGGLG | .....DRAFD |
| <i>Eremomyces bilateralis</i>      | ref XP_033534262.1 | CGEILHNFPYAYKTI | GRNDEAKNVLVIGHAL   | TGSSDVQDWWGGLG | .....DRAFD |
| <i>Coleophoma crateriformis</i>    | ref RDW64025.1     | CGEILHNFPYAYKTI | GRNDEAKNVLVIGHAL   | TGSSDVQDWWGGLG | .....DRAFD |
| <i>Penicillium rolfii</i>          | ref KAF3396381.1   | CGEILHNFPYAYKTI | GRNDEAKNVLVIGHAL   | TGSSDVQDWWGGLG | .....DRAFD |
| <i>Amorphotheca resinacea</i>      | ref XP_024718197.1 | CGEILHNFPYAYKTI | GRNDEAKNVLVIGHAL   | TGSSDVQDWWGGLG | .....DRAFD |
| <i>Chalara longipes</i>            | ref KAE3970763.1   | CGEILHNFPYAYKTI | GRNDEAKNVLVIGHAL   | TGSSDVQDWWGGLG | .....DRAFD |
| <i>Aspergillus terreus</i>         | ref KAG2412800.1   | CGEILHNFPYAYKTI | GRNDEAKNVLVIGHAL   | TGSSDVQDWWGGLG | .....DRAFD |
| <i>Aspergillus nidulans</i>        | ref XP_026603423.1 | CGEILHNFPYAYKTI | GRNDEAKNVLVIGHAL   | TGSSDVQDWWGGLG | .....DRAFD |
| <i>Hyaloscypha variabilis</i>      | ref PMD46603.1     | CGEILHNFPYAYKTI | GRNDEAKNVLVIGHAL   | TGSSDVQDWWGGLG | .....DRAFD |
| <i>Talaromyces marneffii</i>       | ref XP_002145444.1 | CGEILHNFPYAYKTI | GRNDEAKNVLVIGHAL   | TGSSDVQDWWGGLG | .....DRAFD |
| <i>Aspergillus phoenicis</i>       | ref RDK39989.1     | CGEILHNFPYAYKTI | GRNDEAKNVLVIGHAL   | TGSSDVQDWWGGLG | .....DRAFD |
| <i>Aspergillus niger</i>           | ref XP_001398292.1 | CGEILHNFPYAYKTI | GRNDEAKNVLVIGHAL   | TGSSDVQDWWGGLG | .....DRAFD |
| <i>Trichodeltschia bisporula</i>   | ref KAF2400853.1   | CGEILHNFPYAYKTI | GRNDEAKNVLVIGHAL   | TGSSDVQDWWGGLG | .....DRAFD |



|                                    |                    | 90          | 100                     | 110                     | 120 | 130 | 140 |
|------------------------------------|--------------------|-------------|-------------------------|-------------------------|-----|-----|-----|
| <i>Candida albicans</i>            | ref XP_718283.1    | PSRYLLICNSG | SPSYGSCSPVTIDKSS..TGKFP | GSFPLVFRDDVGTQRLIDSLNVR |     |     |     |
| <i>Candida dubliniensis</i>        | ref XP_002421791.1 | PSRFLICNSG  | SPSYGSCSPVTIDKSS..TGKFP | GSFPLVFRDDVGTQRLIDSLNVR |     |     |     |
| <i>Candida tropicalis</i>          | ref XP_002546119.1 | PTKYFIICNSG | SPSYGSCSPVTIDKSS..TGKFP | GSFPLVFRDDVGTQRLIDSLNVR |     |     |     |
| <i>Candida orthopositiva</i>       | ref XP_003865973.1 | PSRFFVICNSG | SPSYGSCSPVTIDKSS..TGKFP | GSFPLVFRDDVGTQRLIDSLNVR |     |     |     |
| <i>Candida parapsilosis</i>        | ref XP_036664758.1 | PSRFFVICNSG | SPSYGSCSPVTIDKSS..TGKFP | GSFPLVFRDDVGTQRLIDSLNVR |     |     |     |
| <i>Candida maltosa</i>             | ref EMG48875.1     | FEVSFIICNSG | SPSYGSCSPVSNKK..TGKFP   | GSFPLVFRDDVGTQRLIDSLNVR |     |     |     |
| <i>Subomyces tanzawaensis</i>      | ref XP_020067300.1 | PSRFFVICNSG | SPSYGSCSPVTIDPA..TGKFP  | GSFPLVFRDDVGTQRLIDSLNVR |     |     |     |
| <i>Candida metapsilosis</i>        | ref KAG5420916.1   | PSRFFVICNSG | SPSYGSCSPVTIDKSS..TGKFP | GSFPLVFRDDVGTQRLIDSLNVR |     |     |     |
| <i>Candida subkharii</i>           | ref KAG7662799.1   | PSRFFVICNSG | SPSYGSCSPVTIDKSS..TGKFP | GSFPLVFRDDVGTQRLIDSLNVR |     |     |     |
| <i>Scheffersomyces stipitis</i>    | ref XP_001383339.1 | PSRYFIICNSG | SPSYGSCSPVSDKSS..TGKFP  | GSFPLVFRDDVGTQRLIDSLNVR |     |     |     |
| <i>Yamadzomya tenuis</i>           | ref XP_006685252.1 | PSRFFVICNSG | SPSYGSCSPVSDKSS..TGKFP  | GSFPLVFRDDVGTQRLIDSLNVR |     |     |     |
| <i>Spathaspora passalidarum</i>    | ref XP_007374001.1 | PSRFFVICNSG | SPSYGSCSPVSDKSS..TGKFP  | GSFPLVFRDDVGTQRLIDSLNVR |     |     |     |
| <i>Dutrinia rugosa</i>             | ref XP_034010932.1 | PSRFFVICNSG | SPSYGSCSPVSDKSS..TGKFP  | GSFPLVFRDDVGTQRLIDSLNVR |     |     |     |
| <i>Millerozyma farinosa</i>        | emb CCB85520.1     | PSRFFVICNSG | SPSYGSCSPVSDKSS..TGKFP  | GSFPLVFRDDVGTQRLIDSLNVR |     |     |     |
| <i>Debaromyces fabryi</i>          | ref XP_015466149.1 | PSRFFVICNSG | SPSYGSCSPVSDKSS..TGKFP  | GSFPLVFRDDVGTQRLIDSLNVR |     |     |     |
| <i>Debaromyces hansenii</i>        | ref XP_460331.1    | PSRFFVICNSG | SPSYGSCSPVSDKSS..TGKFP  | GSFPLVFRDDVGTQRLIDSLNVR |     |     |     |
| <i>Candida viswanathii</i>         | ref RCK53094.1     | PSRYFIICNSG | SPSYGSCSPVSDKSS..TGKFP  | GSFPLVFRDDVGTQRLIDSLNVR |     |     |     |
| <i>Hypophybia burtonii</i>         | ref XP_020074237.1 | PSRFFVICNSG | SPSYGSCSPVSDKSS..TGKFP  | GSFPLVFRDDVGTQRLIDSLNVR |     |     |     |
| <i>Candida auris</i>               | ref P1551135.1     | PSRFFVICNSG | SPSYGSCSPVSDKSS..TGKFP  | GSFPLVFRDDVGTQRLIDSLNVR |     |     |     |
| <i>Clavispora lusitanae</i>        | ref KAF5210728.1   | PSRFFVICNSG | SPSYGSCSPVSDKSS..TGKFP  | GSFPLVFRDDVGTQRLIDSLNVR |     |     |     |
| <i>Scheffersomyces spartane</i>    | ref XP_043049351.1 | PSRFFVICNSG | SPSYGSCSPVSDKSS..TGKFP  | GSFPLVFRDDVGTQRLIDSLNVR |     |     |     |
| <i>Zygosaccharomyces parabolii</i> | ref AQZ18953.1     | PSRFLVICNSG | SPSYGSCSPVSDKSS..TGKFP  | GSFPLVFRDDVGTQRLIDSLNVR |     |     |     |
| <i>Zygosaccharomyces bailii</i>    | emb SJM88098.1     | PSRFLVICNSG | SPSYGSCSPVSDKSS..TGKFP  | GSFPLVFRDDVGTQRLIDSLNVR |     |     |     |
| <i>Kluyveromyces marxianus</i>     | ref KAG681669.1    | PSKFFVICNSG | SPSYGSCSPVSDKSS..TGKFP  | GSFPLVFRDDVGTQRLIDSLNVR |     |     |     |
| <i>Kluyveromyces lactis</i>        | ref QEU60244.1     | PSKFFVICNSG | SPSYGSCSPVSDKSS..TGKFP  | GSFPLVFRDDVGTQRLIDSLNVR |     |     |     |
| <i>Terfezia boudieri</i>           | ref RPB22791.1     | TKRYFVICNSG | SPSYGSCSPVSDKSS..TGKFP  | GSFPLVFRDDVGTQRLIDSLNVR |     |     |     |
| <i>Trimonis nivea</i>              | ref KAF8420454.1   | TKRYFVICNSG | SPSYGSCSPVSDKSS..TGKFP  | GSFPLVFRDDVGTQRLIDSLNVR |     |     |     |
| <i>Kalahariutuber pfeilii</i>      | ref KAF8471959.1   | TKRYFVICNSG | SPSYGSCSPVSDKSS..TGKFP  | GSFPLVFRDDVGTQRLIDSLNVR |     |     |     |
| <i>Terfezia clavayii</i>           | ref KAF8455951.1   | TKRYFVICNSG | SPSYGSCSPVSDKSS..TGKFP  | GSFPLVFRDDVGTQRLIDSLNVR |     |     |     |
| <i>Naumovozyma castellii</i>       | ref XP_003673005.1 | PSRFFVICNSG | SPSYGSCSPVSDKSS..TGKFP  | GSFPLVFRDDVGTQRLIDSLNVR |     |     |     |
| <i>Pachysolen tannophilus</i>      | ref ODV95269.1     | PSRFFVICNSG | SPSYGSCSPVSDKSS..TGKFP  | GSFPLVFRDDVGTQRLIDSLNVR |     |     |     |
| <i>Wickerhamomyces ciferrii</i>    | ref XP_011272307.1 | PSRFFVICNSG | SPSYGSCSPVSDKSS..TGKFP  | GSFPLVFRDDVGTQRLIDSLNVR |     |     |     |
| <i>Lachancea dasiensis</i>         | emb SCU96634.1     | TSRFLVICNSG | SPSYGSCSPVSDKSS..TGKFP  | GSFPLVFRDDVGTQRLIDSLNVR |     |     |     |
| <i>Lipomyces starkeyi</i>          | ref ODQ74338.1     | TSRFFVICNSG | SPSYGSCSPVSDKSS..TGKFP  | GSFPLVFRDDVGTQRLIDSLNVR |     |     |     |
| <i>Saitoella complicata</i>        | ref GAO51702.1     | TSRFFVICNSG | SPSYGSCSPVSDKSS..TGKFP  | GSFPLVFRDDVGTQRLIDSLNVR |     |     |     |
| <i>Torulopsis globosa</i>          | ref XP_037137900.1 | PTKFFVICNSG | SPSYGSCSPVSDKSS..TGKFP  | GSFPLVFRDDVGTQRLIDSLNVR |     |     |     |
| <i>Ascoidea rubescens</i>          | ref XP_020044617.1 | PTKFFVICNSG | SPSYGSCSPVSDKSS..TGKFP  | GSFPLVFRDDVGTQRLIDSLNVR |     |     |     |
| <i>Ogataea philloendri</i>         | ref XP_046063080.1 | TSRFLVICNSG | SPSYGSCSPVSDKSS..TGKFP  | GSFPLVFRDDVGTQRLIDSLNVR |     |     |     |
| <i>Lachancea nothofagi</i>         | emb SCV03058.1     | TSRFLVICNSG | SPSYGSCSPVSDKSS..TGKFP  | GSFPLVFRDDVGTQRLIDSLNVR |     |     |     |
| <i>Eremothecium gossypii</i>       | ref NP_96230.1     | TSRFFVICNSG | SPSYGSCSPVSDKSS..TGKFP  | GSFPLVFRDDVGTQRLIDSLNVR |     |     |     |
| <i>Trichomonascus ciferrii</i>     | ref KAA8897105.1   | PTKFFVICNSG | SPSYGSCSPVSDKSS..TGKFP  | GSFPLVFRDDVGTQRLIDSLNVR |     |     |     |
| <i>Antographum hederac</i>         | ref KAF1990932.1   | TSRFLVICNSG | SPSYGSCSPVSDKSS..TGKFP  | GSFPLVFRDDVGTQRLIDSLNVR |     |     |     |
| <i>Lachancea lanzarotensis</i>     | ref XP_022630543.1 | TSRFLVICNSG | SPSYGSCSPVSDKSS..TGKFP  | GSFPLVFRDDVGTQRLIDSLNVR |     |     |     |
| <i>Cyberlindnera fabianii</i>      | emb CDB47813.1     | TSRFFVICNSG | SPSYGSCSPVSDKSS..TGKFP  | GSFPLVFRDDVGTQRLIDSLNVR |     |     |     |
| <i>Wickerhamella sorbophila</i>    | ref XP_024662504.1 | TSRFFVICNSG | SPSYGSCSPVSDKSS..TGKFP  | GSFPLVFRDDVGTQRLIDSLNVR |     |     |     |
| <i>Lophostoma macrostromum</i>     | ref KAF2652156.1   | TSRFFVICNSG | SPSYGSCSPVSDKSS..TGKFP  | GSFPLVFRDDVGTQRLIDSLNVR |     |     |     |
| <i>Sphaerospora brunnea</i>        | ref KAA892634.1    | TSRFFVICNSG | SPSYGSCSPVSDKSS..TGKFP  | GSFPLVFRDDVGTQRLIDSLNVR |     |     |     |
| <i>Romularia collo-cygni</i>       | ref XP_023631861.1 | TSRFFVICNSG | SPSYGSCSPVSDKSS..TGKFP  | GSFPLVFRDDVGTQRLIDSLNVR |     |     |     |
| <i>Eremomyces bilateralis</i>      | ref XP_033534262.1 | TSRFFVICNSG | SPSYGSCSPVSDKSS..TGKFP  | GSFPLVFRDDVGTQRLIDSLNVR |     |     |     |
| <i>Coleophoma crateriformis</i>    | ref RDW64025.1     | TSRFFVICNSG | SPSYGSCSPVSDKSS..TGKFP  | GSFPLVFRDDVGTQRLIDSLNVR |     |     |     |
| <i>Penicillium rolfii</i>          | ref KAF3396381.1   | TSRFFVICNSG | SPSYGSCSPVSDKSS..TGKFP  | GSFPLVFRDDVGTQRLIDSLNVR |     |     |     |
| <i>Amorophthea resinac</i>         | ref XP_024718197.1 | TSRFFVICNSG | SPSYGSCSPVSDKSS..TGKFP  | GSFPLVFRDDVGTQRLIDSLNVR |     |     |     |
| <i>Chalara longipes</i>            | ref KAE370763.1    | TSRFFVICNSG | SPSYGSCSPVSDKSS..TGKFP  | GSFPLVFRDDVGTQRLIDSLNVR |     |     |     |
| <i>Aspergillus terreus</i>         | ref KAG2412800.1   | TSRFFVICNSG | SPSYGSCSPVSDKSS..TGKFP  | GSFPLVFRDDVGTQRLIDSLNVR |     |     |     |
| <i>Aspergillus nidulans</i>        | ref XP_026603423.1 | TSRFFVICNSG | SPSYGSCSPVSDKSS..TGKFP  | GSFPLVFRDDVGTQRLIDSLNVR |     |     |     |
| <i>Hyaloscypha variabilis</i>      | ref PMD46603.1     | TSRFFVICNSG | SPSYGSCSPVSDKSS..TGKFP  | GSFPLVFRDDVGTQRLIDSLNVR |     |     |     |
| <i>Talaromyces marneffei</i>       | ref XP_002145444.1 | TSRFFVICNSG | SPSYGSCSPVSDKSS..TGKFP  | GSFPLVFRDDVGTQRLIDSLNVR |     |     |     |
| <i>Aspergillus phoenicis</i>       | ref RDK3999.1      | TSRFFVICNSG | SPSYGSCSPVSDKSS..TGKFP  | GSFPLVFRDDVGTQRLIDSLNVR |     |     |     |
| <i>Aspergillus niger</i>           | ref XP_001398292.1 | TSRFFVICNSG | SPSYGSCSPVSDKSS..TGKFP  | GSFPLVFRDDVGTQRLIDSLNVR |     |     |     |
| <i>Trichodelia bisporula</i>       | ref KAF2400853.1   | TSRFFVICNSG | SPSYGSCSPVSDKSS..TGKFP  | GSFPLVFRDDVGTQRLIDSLNVR |     |     |     |

|                                    |                    | 150              | 160               | 170              | 180         | 190 | 200 |
|------------------------------------|--------------------|------------------|-------------------|------------------|-------------|-----|-----|
| <i>Candida albicans</i>            | ref XP_718283.1    | RIAAVVGSGMGGHIAL | YSATINNTGTVQKVVAA | DATAARTSANGISWNE | OROCIFSDOFF |     |     |
| <i>Candida dubliniensis</i>        | ref XP_002421791.1 | RIAAVVGSGMGGHIAL | YSATINNTGTVQKVVAA | DATAARTSANGISWNE | OROCIFSDOFF |     |     |
| <i>Candida tropicalis</i>          | ref XP_002546119.1 | SLAAVVGSGMGGHIAL | YSATINNTGTVQKVVAA | DATAARTSANGISWNE | OROCIFSDOFF |     |     |
| <i>Candida orthopositiva</i>       | ref XP_003865973.1 | QIAAVVGSGMGGHIAL | YSATINNTGTVQKVVAA | DATAARTSANGISWNE | OROCIFSDOFF |     |     |
| <i>Candida parapsilosis</i>        | ref XP_036664758.1 | RIACVVGSGMGGHIAL | YSATINNTGTVQKVVAA | DATAARTSANGISWNE | OROCIFSDOFF |     |     |
| <i>Candida maltosa</i>             | ref EMG48875.1     | SVECVVGSGMGGHIAL | YSATINNTGTVQKVVAA | DATAARTSANGISWNE | OROCIFSDOFF |     |     |
| <i>Subomyces tanzawaensis</i>      | ref XP_020067300.1 | SIACVVGSGMGGHIAL | YSATINNTGTVQKVVAA | DATAARTSANGISWNE | OROCIFSDOFF |     |     |
| <i>Candida metapsilosis</i>        | ref KAG5420916.1   | QIACVVGSGMGGHIAL | YSATINNTGTVQKVVAA | DATAARTSANGISWNE | OROCIFSDOFF |     |     |
| <i>Candida subkharii</i>           | ref KAG7662799.1   | GIACVVGSGMGGHIAL | YSATINNTGTVQKVVAA | DATAARTSANGISWNE | OROCIFSDOFF |     |     |
| <i>Scheffersomyces stipitis</i>    | ref XP_001383339.1 | SIACVVGSGMGGHIAL | YSATINNTGTVQKVVAA | DATAARTSANGISWNE | OROCIFSDOFF |     |     |
| <i>Yamadzomya tenuis</i>           | ref XP_006685252.1 | SIACVVGSGMGGHIAL | YSATINNTGTVQKVVAA | DATAARTSANGISWNE | OROCIFSDOFF |     |     |
| <i>Spathaspora passalidarum</i>    | ref XP_007374001.1 | GIACVVGSGMGGHIAL | YSATINNTGTVQKVVAA | DATAARTSANGISWNE | OROCIFSDOFF |     |     |
| <i>Dutrinia rugosa</i>             | ref XP_034010932.1 | KIAAVVGSGMGGHIAL | YSATINNTGTVQKVVAA | DATAARTSANGISWNE | OROCIFSDOFF |     |     |
| <i>Millerozyma farinosa</i>        | emb CCB85520.1     | GIACVVGSGMGGHIAL | YSATINNTGTVQKVVAA | DATAARTSANGISWNE | OROCIFSDOFF |     |     |
| <i>Debaromyces fabryi</i>          | ref XP_015466149.1 | GIACVVGSGMGGHIAL | YSATINNTGTVQKVVAA | DATAARTSANGISWNE | OROCIFSDOFF |     |     |
| <i>Debaromyces hansenii</i>        | ref XP_460331.1    | GIACVVGSGMGGHIAL | YSATINNTGTVQKVVAA | DATAARTSANGISWNE | OROCIFSDOFF |     |     |
| <i>Candida viswanathii</i>         | ref RCK53094.1     | LLAAVVGSGMGGHIAL | YSATINNTGTVQKVVAA | DATAARTSANGISWNE | OROCIFSDOFF |     |     |
| <i>Hypophybia burtonii</i>         | ref XP_020074237.1 | SLAAVVGSGMGGHIAL | YSATINNTGTVQKVVAA | DATAARTSANGISWNE | OROCIFSDOFF |     |     |
| <i>Candida auris</i>               | ref P1551135.1     | KIACVVGSGMGGHIAL | YSATINNTGTVQKVVAA | DATAARTSANGISWNE | OROCIFSDOFF |     |     |
| <i>Clavispora lusitanae</i>        | ref KAF5210728.1   | SIACVVGSGMGGHIAL | YSATINNTGTVQKVVAA | DATAARTSANGISWNE | OROCIFSDOFF |     |     |
| <i>Scheffersomyces spartane</i>    | ref XP_043049351.1 | SIACVVGSGMGGHIAL | YSATINNTGTVQKVVAA | DATAARTSANGISWNE | OROCIFSDOFF |     |     |
| <i>Zygosaccharomyces parabolii</i> | ref AQZ18953.1     | GVACVVGSGMGGHIAL | YSATINNTGTVQKVVAA | DATAARTSANGISWNE | OROCIFSDOFF |     |     |
| <i>Zygosaccharomyces bailii</i>    | emb SJM88098.1     | GVACVVGSGMGGHIAL | YSATINNTGTVQKVVAA | DATAARTSANGISWNE | OROCIFSDOFF |     |     |
| <i>Kluyveromyces marxianus</i>     | ref KAG681669.1    | SIACVVGSGMGGHIAL | YSATINNTGTVQKVVAA | DATAARTSANGISWNE | OROCIFSDOFF |     |     |
| <i>Kluyveromyces lactis</i>        | ref QEU60244.1     | QVAAVVGSGMGGHIAL | YSATINNTGTVQKVVAA | DATAARTSANGISWNE | OROCIFSDOFF |     |     |
| <i>Terfezia boudieri</i>           | ref RPB22791.1     | QVAAVVGSGMGGHIAL | YSATINNTGTVQKVVAA | DATAARTSANGISWNE | OROCIFSDOFF |     |     |
| <i>Trimonis nivea</i>              | ref KAF8420454.1   | QVAAVVGSGMGGHIAL | YSATINNTGTVQKVVAA | DATAARTSANGISWNE | OROCIFSDOFF |     |     |
| <i>Kalahariutuber pfeilii</i>      | ref KAF8471959.1   | QVAAVVGSGMGGHIAL | YSATINNTGTVQKVVAA | DATAARTSANGISWNE | OROCIFSDOFF |     |     |
| <i>Terfezia clavayii</i>           | ref KAF8455951.1   | QVAAVVGSGMGGHIAL | YSATINNTGTVQKVVAA | DATAARTSANGISWNE | OROCIFSDOFF |     |     |
| <i>Naumovozyma castellii</i>       | ref XP_003673005.1 | SIACVVGSGMGGHIAL | YSATINNTGTVQKVVAA | DATAARTSANGISWNE | OROCIFSDOFF |     |     |
| <i>Pachysolen tannophilus</i>      | ref ODV95269.1     | QIACVVGSGMGGHIAL | YSATINNTGTVQKVVAA | DATAARTSANGISWNE | OROCIFSDOFF |     |     |
| <i>Wickerhamomyces ciferrii</i>    | ref XP_011272307.1 | QIACVVGSGMGGHIAL | YSATINNTGTVQKVVAA | DATAARTSANGISWNE | OROCIFSDOFF |     |     |
| <i>Lachancea dasiensis</i>         | emb SCU96634.1     | QVAAVVGSGMGGHIAL | YSATINNTGTVQKVVAA | DATAARTSANGISWNE | OROCIFSDOFF |     |     |
| <i>Lipomyces starkeyi</i>          | ref ODQ74338.1     | QVAAVVGSGMGGHIAL | YSATINNTGTVQKVVAA | DATAARTSANGISWNE | OROCIFSDOFF |     |     |
| <i>Saitoella complicata</i>        | ref GAO51702.1     | QVAAVVGSGMGGHIAL | YSATINNTGTVQKVVAA | DATAARTSANGISWNE | OROCIFSDOFF |     |     |
| <i>Torulopsis globosa</i>          | ref XP_037137900.1 | SIACVVGSGMGGHIAL | YSATINNTGTVQKVVAA | DATAARTSANGISWNE | OROCIFSDOFF |     |     |
| <i>Ascoidea rubescens</i>          | ref XP_020044617.1 | QVAAVVGSGMGGHIAL | YSATINNTGTVQKVVAA | DATAARTSANGISWNE | OROCIFSDOFF |     |     |
| <i>Ogataea philloendri</i>         | ref XP_046063080.1 | QIACVVGSGMGGHIAL | YSATINNTGTVQKVVAA | DATAARTSANGISWNE | OROCIFSDOFF |     |     |
| <i>Lachancea nothofagi</i>         | emb SCV03058.1     | SVACVVGSGMGGHIAL | YSATINNTGTVQKVVAA | DATAARTSANGISWNE | OROCIFSDOFF |     |     |
| <i>Eremothecium gossypii</i>       | ref NP_96230.1     | QVAAVVGSGMGGHIAL | YSATINNTGTVQKVVAA | DATAARTSANGISWNE | OROCIFSDOFF |     |     |
| <i>Trichomonascus ciferrii</i>     | ref KAA8897105.1   | QIACVVGSGMGGHIAL | YSATINNTGTVQKVVAA | DATAARTSANGISWNE | OROCIFSDOFF |     |     |
| <i>Antographum hederac</i>         | ref KAF1990932.1   | QIACVVGSGMGGHIAL | YSATINNTGTVQKVVAA | DATAARTSANGISWNE | OROCIFSDOFF |     |     |
| <i>Lachancea lanzarotensis</i>     | ref XP_022630543.1 | SVACVVGSGMGGHIAL | YSATINNTGTVQKVVAA | DATAARTSANGISWNE | OROCIFSDOFF |     |     |
| <i>Cyberlindnera fabianii</i>      | emb CDB47813.1     | QVAAVVGSGMGGHIAL | YSATINNTGTVQKVVAA | DATAARTSANGISWNE | OROCIFSDOFF |     |     |
| <i>Wickerhamella sorbophila</i>    | ref XP_024662504.1 | QIACVVGSGMGGHIAL | YSATINNTGTVQKVVAA | DATAARTSANGISWNE | OROCIFSDOFF |     |     |
| <i>Lophostoma macrostromum</i>     | ref KAF2652156.1   | QIACVVGSGMGGHIAL | YSATINNTGTVQKVVAA | DATAARTSANGISWNE | OROCIFSDOFF |     |     |
| <i>Sphaerospora brunnea</i>        | ref KAA892634.1    | QVAAVVGSGMGGHIAL | YSATINNTGTVQKVVAA | DATAARTSANGISWNE | OROCIFSDOFF |     |     |
| <i>Romularia collo-cygni</i>       | ref XP_023631861.1 | QVAAVVGSGMGGHIAL | YSATINNTGTVQKVVAA | DATAARTSANGISWNE | OROCIFSDOFF |     |     |
| <i>Eremomyces bilateralis</i>      | ref XP_033534262.1 | QIACVVGSGMGGHIAL | YSATINNTGTVQKVVAA | DATAARTSANGISWNE | OROCIFSDOFF |     |     |
| <i>Coleophoma crateriformis</i>    | ref RDW64025.1     | QVAAVVGSGMGGHIAL | YSATINNTGTVQKVVAA | DATAARTSANGISWNE | OROCIFSDOFF |     |     |
| <i>Penicillium rolfii</i>          | ref KAF3396381.1   | QIACVVGSGMGGHIAL | YSATINNTGTVQKVVAA | DATAARTSANGISWNE | OROCIFSDOFF |     |     |
| <i>Amorophthea resinac</i>         | ref XP_024718197.1 | QVAAVVGSGMGGHIAL | YSATINNTGTVQKVVAA | DATAARTSANGISWNE | OROCIFSDOFF |     |     |
| <i>Chalara longipes</i>            | ref KAE370763.1    | QVAAVVGSGMGGHIAL | YSATINNTGTVQKVVAA | DATAARTSANGISWNE | OROCIFSDOFF |     |     |
| <i>Aspergillus terreus</i>         | ref KAG2412800.1   | QIACVVGSGMGGHIAL | YSATINNTGTVQKVVAA | DATAARTSANGISWNE | OROCIFSDOFF |     |     |
| <i>Aspergillus nidulans</i>        | ref XP_026603423.1 | QIACVVGSGMGGHIAL | YSATINNTGTVQKVVAA | DATAARTSANGISWNE | OROCIFSDOFF |     |     |
| <i>Hyaloscypha variabilis</i>      | ref PMD46603.1     | QVAAVVGSGMGGHIAL | YSATINNTGTVQKVVAA | DATAARTSANGISWNE | OROCIFSDOFF |     |     |
| <i>Talaromyces marneffei</i>       | ref XP_002145444.1 | QIACVVGSGMGGHIAL | YSATINNTGTVQKVVAA | DATAARTSANGISWNE | OROCIFSDOFF |     |     |
| <i>Aspergillus phoenicis</i>       | ref RDK3999.1      | QIACVVGSGMGGHIAL | YSATINNTGTVQKVVAA | DATAARTSANGISWNE | OROCIFSDOFF |     |     |
| <i>Aspergillus niger</i>           | ref XP_001398292.1 | QIACVVGSGMGGHIAL | YSATINNTGTVQKVVAA | DATAARTSANGISWNE | OROCIFSDOFF |     |     |
| <i>Trichodelia bisporula</i>       | ref KAF2400853.1   | SIACVVGSGMGGHIAL | YSATINNTGTVQKVVAA | DATAARTSANGISWNE | OROCIFSDOFF |     |     |



210 220 230 240 250

*Candida albicans* ref |XP\_718283.1| YDGGVYET..GNKDDSGLSAARMAAALLTYRSRNSFESFGRKLGRSP.....NDG  
*Candida dubliniensis* ref |XP\_002421791.1| YDGGVYET..GNKDDSGLSAARMAAALLTYRSRNSFESFGRKLGRSP.....SDG  
*Candida tropicalis* ref |XP\_002546119.1| YDGGVYET..GNKDDSGLSAARMAAALLTYRSRNSFESFGRKLGRSP.....SSA  
*Candida orthoplosis* ref |XP\_003865973.1| YDGGVYENLGLKDDSGLSAARMAAALLTYRSRNSFESFGRKLGRSP.....KLS  
*Candida parapsilosis* ref |XP\_036664758.1| YDGGVYENKLGKDDSGLSAARMAAALLTYRSRNSFESFGRKLGRSP.....SLN  
*Candida maltosa* gb |EMG48875.1| FEDGGVYQI..SNKDDGGLSARMAAALLTYRSRNSFESFGRKLGRSP.....DD.  
*Subomyces tanzavaensis* ref |XP\_020067300.1| YDGGVYET..NNKDDSGLSAARMAAALLTYRSRNSFESFGRKLGRSP.....PKTQ  
*Candida metapsilosis* gb |KAG5420916.1| YDGGVYENKLGKDDSGLSAARMAAALLTYRSRNSFESFGRKLGRSP.....KLS  
*Candida subhashii* gb |KAG7662799.1| YDGGVYEN..TIKDDGGLSARMAAALLTYRSRNSFESFGRKLGRSP.....LQKS.SSINSLSPE  
*Scheffersomyces stipitis* ref |XP\_001383339.1| YDGGVYEN.NGKDDSGLSAARMAAALLTYRSRNSFESFGRKLGRSP.....NKIGSE  
*Yamadazyma tenuis* ref |XP\_006685252.1| YDGGVYENSPNGVDDSGLSAARMAAALLTYRSRNSFESFGRKLGRSP.....GVKN  
*Spathaspora passalidarum* ref |XP\_007374001.1| YDGGVYENSGVDDSGLSAARMAAALLTYRSRNSFESFGRKLGRSP.....KAAKPEFSNLSEE  
*Diutina rugosa* gb |XP\_034010932.1| YDGGVYEN.EGAKDDSGLSAARMAAALLTYRSRNSFESFGRKLGRSP.....NQQP.AGASTAVTAA  
*Millerozyma farinosa* emb |CCB85520.1| YDGGVYEREDGAKDDSGLSAARMAAALLTYRSRNSFESFGRKLGRSP.....SKDQ  
*Debaromyces fabryi* ref |XP\_015466149.1| YDGGVYENKNGIKDDSGLSAARMAAALLTYRSRNSFESFGRKLGRSP.....SVKS.NTQNGISEE  
*Debaromyces hansenii* ref |XP\_460331.1| YDGGVYENKNGIKDDSGLSAARMAAALLTYRSRNSFESFGRKLGRSP.....SVKA.NIEPKEISEE  
*Candida viswanathii* gb |RCG59094.1| YDGGVYEDF..DDPDDSGLSAARMAAALLTYRSRNSFESFGRKLGRSP.....KDE  
*Hyphopichia burtonii* ref |XP\_020074237.1| YDGGVYERSDNNVDDSGLSAARMAAALLTYRSRNSFESFGRKLGRSP.....NTDPKAYQKQ  
*Candida auris* gb |PI551135.1| YDGGVYENPKGLRDPDGLSARMAAALLTYRSRNSFESFGRKLGRSP.....EDQ  
*Clavispora lusitanae* gb |KAF5210728.1| YDGGVYETPN..LSPNGGLSARMAAALLTYRSRNSFESFGRKLGRSP.....Q  
*Scheffersomyces spartinae* ref |XP\_043049351.1| YDGGVYEN..GNSNGGLSARMAAALLTYRSRNSFESFGRKLGRSP.....SSSS  
*Zygosaccharomyces parabailli* gb |AQ218953.1| YDGGVYSLN...DPPDGLSARMAAALLTYRSRNSFESFGRKLGRSP.....KKNFARIPSAEHSNKVARP...  
*Zygosaccharomyces bailii* emb |JSM88098.1| YDGGVYSLN...DPPDGLSARMAAALLTYRSRNSFESFGRKLGRSP.....KKNFARIPSAEHSNKVARP...  
*Kluyveromyces marxianus* gb |KAG0681669.1| YDGGVYSLD...EPPDGLSARMAAALLTYRSRNSFESFGRKLGRSP.....SLQQQKSGRLDAQT  
*Kluyveromyces lactis* gb |QBU50244.1| YDGGVYSLD...EPPDGLSARMAAALLTYRSRNSFESFGRKLGRSP.....SLQQQKSGR...  
*Terfezia boudieri* gb |RPB2791.1| YDGGVYSLD...EPPDGLSARMAAALLTYRSRNSFESFGRKLGRSP.....SLQQQKSGR...  
*Trimitana nivea* gb |KAF8420454.1| YDGGVYSLD...EPPDGLSARMAAALLTYRSRNSFESFGRKLGRSP.....SLQQQKSGR...  
*Kalaharutuber pfeilii* gb |KAF8471959.1| YDGGVYSLD...EPPDGLSARMAAALLTYRSRNSFESFGRKLGRSP.....SLQQQKSGR...  
*Terfezia clavervii* gb |KAF8455951.1| YDGGVYSLD...EPPDGLSARMAAALLTYRSRNSFESFGRKLGRSP.....SLQQQKSGR...  
*Nannozyma castellii* ref |XP\_003673005.1| YDGGVYSLD...EPPDGLSARMAAALLTYRSRNSFESFGRKLGRSP.....SLQQQKSGR...  
*Pachysolen tannophilus* gb |ODV95269.1| YDGGVYSLD...EPPDGLSARMAAALLTYRSRNSFESFGRKLGRSP.....SLQQQKSGR...  
*Wickerhamomyces ciferrii* ref |XP\_011272307.1| YDGGVYDPK...DPPSGLSARMAAALLTYRSRNSFESFGRKLGRSP.....SIVQKN...  
*Lachancea danielsii* emb |SCU96634.1| YDGGVYDQ...KQVVGGLSARMAAALLTYRSRNSFESFGRKLGRSP.....SVLHQHSRO...  
*Lipomyces starkei* gb |ODQ74338.1| YDGGVYAFD...DPPSGLSARMAAALLTYRSRNSFESFGRKLGRSP.....ASHRIV...  
*Saitoella complicata* gb |GAO51702.1| YDGGVYAFD...DPPSGLSARMAAALLTYRSRNSFESFGRKLGRSP.....SKOPYNAL...  
*Torulaspora globosa* ref |XP\_037137900.1| YDGGVYSLQ...DPPDGLSARMAAALLTYRSRNSFESFGRKLGRSP.....FARIPSAEHSNKVARP...  
*Ascoidea rubescens* ref |XP\_020048617.1| YDGGVYSLD...EPPDGLSARMAAALLTYRSRNSFESFGRKLGRSP.....SLQQQKSGR...  
*Ogataea philloendrii* ref |XP\_046063080.1| YDGGVYSLD...EPPDGLSARMAAALLTYRSRNSFESFGRKLGRSP.....SLQQQKSGR...  
*Lachancea nethofi* emb |SCU3058.1| YDGGVYSLD...EPPDGLSARMAAALLTYRSRNSFESFGRKLGRSP.....SLQQQKSGR...  
*Eremothecium gossypii* ref |NP\_986230.1| YDGGVYSLD...EPPDGLSARMAAALLTYRSRNSFESFGRKLGRSP.....SLQQQKSGR...  
*Trichomonascus ciferrii* gb |KAA8897105.1| YDGGVYSLD...EPPDGLSARMAAALLTYRSRNSFESFGRKLGRSP.....SLQQQKSGR...  
*Autographum hederace* gb |KAF1990932.1| YDGGVYSLD...EPPDGLSARMAAALLTYRSRNSFESFGRKLGRSP.....SLQQQKSGR...  
*Lachancea lanzarotensis* ref |XP\_022630543.1| YDGGVYSLD...EPPDGLSARMAAALLTYRSRNSFESFGRKLGRSP.....SLQQQKSGR...  
*Cyberlindnera fabianii* emb |COR47813.1| YDGGVYSLD...EPPDGLSARMAAALLTYRSRNSFESFGRKLGRSP.....SLQQQKSGR...  
*Wickerhamiella sorbophila* ref |XP\_024662504.1| YDGGVYSLD...EPPDGLSARMAAALLTYRSRNSFESFGRKLGRSP.....SLQQQKSGR...  
*Lophiostoma macrostomum* gb |KAF2652156.1| YDGGVYSLD...EPPDGLSARMAAALLTYRSRNSFESFGRKLGRSP.....SLQQQKSGR...  
*Sphaerospora brunnea* gb |KAA8892634.1| YDGGVYSLD...EPPDGLSARMAAALLTYRSRNSFESFGRKLGRSP.....SLQQQKSGR...  
*Romularia collo-cygni* ref |XP\_023631861.1| YDGGVYSLD...EPPDGLSARMAAALLTYRSRNSFESFGRKLGRSP.....SLQQQKSGR...  
*Eremomyces bilateralis* ref |XP\_033534262.1| YDGGVYSLD...EPPDGLSARMAAALLTYRSRNSFESFGRKLGRSP.....SLQQQKSGR...  
*Coleophoma crateriformis* gb |RDW64025.1| YDGGVYSLD...EPPDGLSARMAAALLTYRSRNSFESFGRKLGRSP.....SLQQQKSGR...  
*Penicillium rolfsii* gb |KAF3396381.1| YDGGVYSLD...EPPDGLSARMAAALLTYRSRNSFESFGRKLGRSP.....SLQQQKSGR...  
*Amorphotheca resinae* ref |XP\_024718197.1| YDGGVYSLD...EPPDGLSARMAAALLTYRSRNSFESFGRKLGRSP.....SLQQQKSGR...  
*Chalara longipes* gb |KAF370763.1| YDGGVYSLD...EPPDGLSARMAAALLTYRSRNSFESFGRKLGRSP.....SLQQQKSGR...  
*Aspergillus terreus* gb |KAG2412800.1| YDGGVYSLD...EPPDGLSARMAAALLTYRSRNSFESFGRKLGRSP.....SLQQQKSGR...  
*Aspergillus mulundensis* ref |XP\_026603423.1| YDGGVYSLD...EPPDGLSARMAAALLTYRSRNSFESFGRKLGRSP.....SLQQQKSGR...  
*Hyaloscypha variabilis* gb |PMD46603.1| YDGGVYSLD...EPPDGLSARMAAALLTYRSRNSFESFGRKLGRSP.....SLQQQKSGR...  
*Talaromyces marneffei* ref |XP\_002145444.1| YDGGVYSLD...EPPDGLSARMAAALLTYRSRNSFESFGRKLGRSP.....SLQQQKSGR...  
*Aspergillus phoenicis* gb |RDK39989.1| YDGGVYSLD...EPPDGLSARMAAALLTYRSRNSFESFGRKLGRSP.....SLQQQKSGR...  
*Aspergillus niger* ref |XP\_001398292.1| YDGGVYSLD...EPPDGLSARMAAALLTYRSRNSFESFGRKLGRSP.....SLQQQKSGR...  
*Trichodelia bispurula* gb |KAF2400853.1| YDGGVYSLD...EPPDGLSARMAAALLTYRSRNSFESFGRKLGRSP.....SLQQQKSGR...

260 270

*Candida albicans* ref |XP\_718283.1| GASP.....RTKH.EEH.....SLLNQGSKL.....IN  
*Candida dubliniensis* ref |XP\_002421791.1| SASP.....RTKH.EEH.....SLLNQGSKL.....VN  
*Candida tropicalis* ref |XP\_002546119.1| SLSPENSRSRSPRSQ.EEH.....SLLNQGSKL.....VK  
*Candida orthoplosis* ref |XP\_003865973.1| NK.DDSV.DETGKVPKTKD.EEH.....SLLNQGSKL.....KLS  
*Candida parapsilosis* ref |XP\_036664758.1| SKGDDEI.DESGKVPKTKD.EEH.....SLLNQGSKL.....LQKS.SSINSLSPE  
*Candida maltosa* gb |EMG48875.1| ..TEES.VKEAVRYPKTKD.EEN.....SLLNQGSKL.....DD.  
*Subomyces tanzavaensis* ref |XP\_020067300.1| ..TEES.VKEAVRYPKTKD.EEN.....SLLNQGSKL.....PKTQ  
*Candida metapsilosis* gb |KAG5420916.1| ..TEES.VKEAVRYPKTKD.EEN.....SLLNQGSKL.....KLS  
*Candida subhashii* gb |KAG7662799.1| ..TEES.VKEAVRYPKTKD.EEN.....SLLNQGSKL.....LQKS.SSINSLSPE  
*Scheffersomyces stipitis* ref |XP\_001383339.1| ..TEES.VKEAVRYPKTKD.EEN.....SLLNQGSKL.....NKIGSE  
*Yamadazyma tenuis* ref |XP\_006685252.1| ..TEES.VKEAVRYPKTKD.EEN.....SLLNQGSKL.....GVKN  
*Spathaspora passalidarum* ref |XP\_007374001.1| ..TEES.VKEAVRYPKTKD.EEN.....SLLNQGSKL.....KAAKPEFSNLSEE  
*Diutina rugosa* gb |XP\_034010932.1| ..TEES.VKEAVRYPKTKD.EEN.....SLLNQGSKL.....NQQP.AGASTAVTAA  
*Millerozyma farinosa* emb |CCB85520.1| ..TEES.VKEAVRYPKTKD.EEN.....SLLNQGSKL.....SKDQ  
*Debaromyces fabryi* ref |XP\_015466149.1| ..TEES.VKEAVRYPKTKD.EEN.....SLLNQGSKL.....SVKS.NTQNGISEE  
*Debaromyces hansenii* ref |XP\_460331.1| ..TEES.VKEAVRYPKTKD.EEN.....SLLNQGSKL.....SVKA.NIEPKEISEE  
*Candida viswanathii* gb |RCG59094.1| ..TEES.VKEAVRYPKTKD.EEN.....SLLNQGSKL.....KDE  
*Hyphopichia burtonii* ref |XP\_020074237.1| ..TEES.VKEAVRYPKTKD.EEN.....SLLNQGSKL.....NTDPKAYQKQ  
*Candida auris* gb |PI551135.1| ..TEES.VKEAVRYPKTKD.EEN.....SLLNQGSKL.....EDQ  
*Clavispora lusitanae* gb |KAF5210728.1| ..TEES.VKEAVRYPKTKD.EEN.....SLLNQGSKL.....Q  
*Scheffersomyces spartinae* ref |XP\_043049351.1| ..TEES.VKEAVRYPKTKD.EEN.....SLLNQGSKL.....SSSS  
*Zygosaccharomyces parabailli* gb |AQ218953.1| ..TEES.VKEAVRYPKTKD.EEN.....SLLNQGSKL.....KKNFARIPSAEHSNKVARP...  
*Zygosaccharomyces bailii* emb |JSM88098.1| ..TEES.VKEAVRYPKTKD.EEN.....SLLNQGSKL.....KKNFARIPSAEHSNKVARP...  
*Kluyveromyces marxianus* gb |KAG0681669.1| ..TEES.VKEAVRYPKTKD.EEN.....SLLNQGSKL.....SLQQQKSGRLDAQT  
*Kluyveromyces lactis* gb |QBU50244.1| ..TEES.VKEAVRYPKTKD.EEN.....SLLNQGSKL.....SLQQQKSGR...  
*Terfezia boudieri* gb |RPB2791.1| ..TEES.VKEAVRYPKTKD.EEN.....SLLNQGSKL.....SLQQQKSGR...  
*Trimitana nivea* gb |KAF8420454.1| ..TEES.VKEAVRYPKTKD.EEN.....SLLNQGSKL.....SLQQQKSGR...  
*Kalaharutuber pfeilii* gb |KAF8471959.1| ..TEES.VKEAVRYPKTKD.EEN.....SLLNQGSKL.....SLQQQKSGR...  
*Terfezia clavervii* gb |KAF8455951.1| ..TEES.VKEAVRYPKTKD.EEN.....SLLNQGSKL.....SLQQQKSGR...  
*Nannozyma castellii* ref |XP\_003673005.1| ..TEES.VKEAVRYPKTKD.EEN.....SLLNQGSKL.....SLQQQKSGR...  
*Pachysolen tannophilus* gb |ODV95269.1| ..TEES.VKEAVRYPKTKD.EEN.....SLLNQGSKL.....SLQQQKSGR...  
*Wickerhamomyces ciferrii* ref |XP\_011272307.1| ..TEES.VKEAVRYPKTKD.EEN.....SLLNQGSKL.....SIVQKN...  
*Lachancea danielsii* emb |SCU96634.1| ..TEES.VKEAVRYPKTKD.EEN.....SLLNQGSKL.....SVLHQHSRO...  
*Lipomyces starkei* gb |ODQ74338.1| ..TEES.VKEAVRYPKTKD.EEN.....SLLNQGSKL.....ASHRIV...  
*Saitoella complicata* gb |GAO51702.1| ..TEES.VKEAVRYPKTKD.EEN.....SLLNQGSKL.....SKOPYNAL...  
*Torulaspora globosa* ref |XP\_037137900.1| ..TEES.VKEAVRYPKTKD.EEN.....SLLNQGSKL.....FARIPSAEHSNKVARP...  
*Ascoidea rubescens* ref |XP\_020048617.1| ..TEES.VKEAVRYPKTKD.EEN.....SLLNQGSKL.....SLQQQKSGR...  
*Ogataea philloendrii* ref |XP\_046063080.1| ..TEES.VKEAVRYPKTKD.EEN.....SLLNQGSKL.....SLQQQKSGR...  
*Lachancea nethofi* emb |SCU3058.1| ..TEES.VKEAVRYPKTKD.EEN.....SLLNQGSKL.....SLQQQKSGR...  
*Eremothecium gossypii* ref |NP\_986230.1| ..TEES.VKEAVRYPKTKD.EEN.....SLLNQGSKL.....SLQQQKSGR...  
*Trichomonascus ciferrii* gb |KAA8897105.1| ..TEES.VKEAVRYPKTKD.EEN.....SLLNQGSKL.....SLQQQKSGR...  
*Autographum hederace* gb |KAF1990932.1| ..TEES.VKEAVRYPKTKD.EEN.....SLLNQGSKL.....SLQQQKSGR...  
*Lachancea lanzarotensis* ref |XP\_022630543.1| ..TEES.VKEAVRYPKTKD.EEN.....SLLNQGSKL.....SLQQQKSGR...  
*Cyberlindnera fabianii* emb |COR47813.1| ..TEES.VKEAVRYPKTKD.EEN.....SLLNQGSKL.....SLQQQKSGR...  
*Wickerhamiella sorbophila* ref |XP\_024662504.1| ..TEES.VKEAVRYPKTKD.EEN.....SLLNQGSKL.....SLQQQKSGR...  
*Lophiostoma macrostomum* gb |KAF2652156.1| ..TEES.VKEAVRYPKTKD.EEN.....SLLNQGSKL.....SLQQQKSGR...  
*Sphaerospora brunnea* gb |KAA8892634.1| ..TEES.VKEAVRYPKTKD.EEN.....SLLNQGSKL.....SLQQQKSGR...  
*Romularia collo-cygni* ref |XP\_023631861.1| ..TEES.VKEAVRYPKTKD.EEN.....SLLNQGSKL.....SLQQQKSGR...  
*Eremomyces bilateralis* ref |XP\_033534262.1| ..TEES.VKEAVRYPKTKD.EEN.....SLLNQGSKL.....SLQQQKSGR...  
*Coleophoma crateriformis* gb |RDW64025.1| ..TEES.VKEAVRYPKTKD.EEN.....SLLNQGSKL.....SLQQQKSGR...  
*Penicillium rolfsii* gb |KAF3396381.1| ..TEES.VKEAVRYPKTKD.EEN.....SLLNQGSKL.....SLQQQKSGR...  
*Amorphotheca resinae* ref |XP\_024718197.1| ..TEES.VKEAVRYPKTKD.EEN.....SLLNQGSKL.....SLQQQKSGR...  
*Chalara longipes* gb |KAF370763.1| ..TEES.VKEAVRYPKTKD.EEN.....SLLNQGSKL.....SLQQQKSGR...  
*Aspergillus terreus* gb |KAG2412800.1| ..TEES.VKEAVRYPKTKD.EEN.....SLLNQGSKL.....SLQQQKSGR...  
*Aspergillus mulundensis* ref |XP\_026603423.1| ..TEES.VKEAVRYPKTKD.EEN.....SLLNQGSKL.....SLQQQKSGR...  
*Hyaloscypha variabilis* gb |PMD46603.1| ..TEES.VKEAVRYPKTKD.EEN.....SLLNQGSKL.....SLQQQKSGR...  
*Talaromyces marneffei* ref |XP\_002145444.1| ..TEES.VKEAVRYPKTKD.EEN.....SLLNQGSKL.....SLQQQKSGR...  
*Aspergillus phoenicis* gb |RDK39989.1| ..TEES.VKEAVRYPKTKD.EEN.....SLLNQGSKL.....SLQQQKSGR...  
*Aspergillus niger* ref |XP\_001398292.1| ..TEES.VKEAVRYPKTKD.EEN.....SLLNQGSKL.....SLQQQKSGR...  
*Trichodelia bispurula* gb |KAF2400853.1| ..TEES.VKEAVRYPKTKD.EEN.....SLLNQGSKL.....SLQQQKSGR...

280 290

*Candida albicans* ref |XP\_718283.1| ..TEES.VKEAVRYPKTKD.EEN.....SLLNQGSKL.....IN  
*Candida dubliniensis* ref |XP\_002421791.1| ..TEES.VKEAVRYPKTKD.EEN.....SLLNQGSKL.....VN  
*Candida tropicalis* ref |XP\_002546119.1| ..TEES.VKEAVRYPKTKD.EEN.....SLLNQGSKL.....VK  
*Candida orthoplosis* ref |XP\_003865973.1| ..TEES.VKEAVRYPKTKD.EEN.....SLLNQGSKL.....KLS  
*Candida parapsilosis* ref |XP\_036664758.1| ..TEES.VKEAVRYPKTKD.EEN.....SLLNQGSKL.....LQKS.SSINSLSPE  
*Candida maltosa* gb |EMG48875.1| ..TEES.VKEAVRYPKTKD.EEN.....SLLNQGSKL.....DD.  
*Subomyces tanzavaensis* ref |XP\_020067300.1| ..TEES.VKEAVRYPKTKD.EEN.....SLLNQGSKL.....PKTQ  
*Candida metapsilosis* gb |KAG5420916.1| ..TEES.VKEAVRYPKTKD.EEN.....SLLNQGSKL.....KLS  
*Candida subhashii* gb |KAG7662799.1| ..TEES.VKEAVRYPKTKD.EEN.....SLLNQGSKL.....LQKS.SSINSLSPE  
*Scheffersomyces stipitis* ref |XP\_001383339.1| ..TEES.VKEAVRYPKTKD.EEN.....SLLNQGSKL.....NKIGSE  
*Yamadazyma tenuis* ref |XP\_006685252.1| ..TEES.VKEAVRYPKTKD.EEN.....SLLNQGSKL.....GVKN  
*Spathaspora passalidarum* ref |XP\_007374001.1| ..TEES.VKEAVRYPKTKD.EEN.....SLLNQGSKL.....KAAKPEFSNLSEE  
*Diutina rugosa* gb |XP\_034010932.1| ..TEES.VKEAVRYPKTKD.EEN.....SLLNQGSKL.....NQQP.AGASTAVTAA  
*Millerozyma farinosa* emb |CCB85520.1| ..TEES.VKEAVRYPKTKD.EEN.....SLLNQGSKL.....SKDQ  
*Debaromyces fabryi* ref |XP\_015466149.1| ..TEES.VKEAVRYPKTKD.EEN.....SLLNQGSKL.....SVKS.NTQNGISEE  
*Debaromyces hansenii* ref |XP\_460331.1| ..TEES.VKEAVRYPKTKD.EEN.....SLLNQGSKL.....SVKA.NIEPKEISEE  
*Candida viswanathii* gb |RCG59094.1| ..TEES.VKEAVRYPKTKD.EEN.....SLLNQGSKL.....KDE  
*Hyphopichia burtonii* ref |XP\_020074237.1| ..TEES.VKEAVRYPKTKD.EEN.....SLLNQGSKL.....NTDPKAYQKQ  
*Candida auris* gb |PI551135.1| ..TEES.VKEAVRYPKTKD.EEN.....SLLNQGSKL.....EDQ  
*Clavispora lusitanae* gb |KAF5210728.1| ..TEES.VKEAVRYPKTKD.EEN.....SLLNQGSKL.....Q  
*Scheffersomyces spartinae* ref |XP\_043049351.1| ..TEES.VKEAVRYPKTKD.EEN.....SLLNQGSKL.....SSSS  
*Zygosaccharomyces parabailli* gb |AQ218953.1| ..TEES.VKEAVRYPKTKD.EEN.....SLLNQGSKL.....KKNFARIPSAEHSNKVARP...  
*Zygosaccharomyces bailii* emb |JSM88098.1| ..TEES.VKEAVRYPKTKD.EEN.....SLLNQGSKL.....KKNFARIPSAEHSNKVARP...  
*Kluyveromyces marxianus* gb |KAG0681669.1| ..TEES.VKEAVRYPKTKD.EEN.....SLLNQGSKL.....SLQQQKSGRLDAQT  
*Kluyveromyces lactis* gb |QBU50244.1| ..TEES.VKEAVRYPKTKD.EEN.....SLLNQGSKL.....SLQQQKSGR...  
*Terfezia boudieri* gb |RPB2791.1| ..TEES.VKEAVRYPKTKD.EEN.....SLLNQGSKL.....SLQQQKSGR...  
*Trimitana nivea* gb |KAF8420454.1| ..TEES.VKEAVRYPKTKD.EEN.....SLLNQGSKL.....SLQQQKSGR...  
*Kalaharutuber pfeilii* gb |KAF8471959.1| ..TEES.VKEAVRYPKTKD.EEN.....SLLNQGSKL.....SLQQQKSGR...  
*Terfezia clavervii* gb |KAF8455951.1| ..TEES.VKEAVRYPKTKD.EEN.....SLLNQGSKL.....SLQQQKSGR...  
*Nannozyma castellii* ref |XP\_003673005.1| ..TEES.VKEAVRYPKTKD.EEN.....SLLNQGSKL.....SLQQQKSGR...  
*Pachysolen tannophilus* gb |ODV95269.1| ..TEES.VKEAVRYPKTKD.EEN.....SLLNQGSKL.....SLQQQKSGR...  
*Wickerhamomyces ciferrii* ref |XP\_011272307.1| ..TEES.VKEAVRYPKTKD.EEN.....SLLNQGSKL.....SIVQKN...  
*Lachancea danielsii* emb |SCU96634.1| ..TEES.VKEAVRYPKTKD.EEN.....SLLNQGSKL.....SVLHQHSRO...  
*Lipomyces starkei* gb |ODQ74338.1| ..TEES.VKEAVRYPKTKD.EEN.....SLLNQGSKL.....ASHRIV...  
*Saitoella complicata* gb |GAO51702.1| ..TEES.VKEAVRYPKTKD.EEN.....SLLNQGSKL.....SKOPYNAL...  
*Torulaspora globosa* ref |XP\_037137900.1| ..TEES.VKEAVRYPKTKD.EEN.....SLLNQGSKL.....FARIPSAEHSNKVARP...  
*Ascoidea rubescens* ref |XP\_020048617.1| ..TEES.VKEAVRYPKTKD.EEN.....SLLNQGSKL.....SLQQQKSGR...  
*Ogataea philloendrii* ref |XP\_046063080.1| ..TEES.VKEAVRYPKTKD.EEN.....SLLNQGSKL.....SLQQQKSGR...  
*Lachancea nethofi* emb |SCU3058.1| ..TEES.VKEAVRYPKTKD.EEN.....SLLNQGSKL.....SLQQQKSGR...  
*Eremothecium gossypii* ref |NP\_986230.1| ..TEES.VKEAVRYPKTKD.EEN.....SLLNQGSKL.....SLQQQKSGR...  
*Trichomonascus ciferrii* gb |KAA8897105.1| ..TEES.VKEAVRYPKTKD.EEN.....SLLNQGSKL.....SLQQQKSGR...  
*Autographum hederace* gb |KAF1990932.1| ..TEES.VKEAVRYPKTKD.EEN.....SLLNQGSKL.....SLQQQKSGR...  
*Lachancea lanzarotensis* ref |XP\_022630543.1| ..TEES.VKEAVRYPKTKD.EEN.....SLLNQGSKL.....SLQQQKSGR...  
*Cyberlindnera fabianii* emb |COR47813.1| ..TEES.VKEAVRYPKTKD.EEN.....SLLNQGSKL.....SLQQQKSGR...  
*Wickerhamiella sorbophila* ref |XP\_024662504.1| ..TEES.VKEAVRYPKTKD.EEN.....SLLNQGSKL.....SLQQQKSGR...  
*Lophiostoma macrostomum* gb |KAF2652156.1| ..TEES.VKEAVRYPKTKD.EEN.....SLLNQGSKL.....SLQQQKSGR...  
*Sphaerospora brunnea* gb |KAA8892634.1| ..TEES.VKEAVRYPKTKD.EEN.....SLLNQGSKL.....SLQQQKSGR...  
*Romularia collo-cygni* ref |XP\_023631861.1| ..TEES.VKEAVRYPKTKD.EEN.....SLLNQGSKL.....SLQQQKSGR...  
*Eremomyces bilateralis* ref |XP\_033534262.1| ..TEES.VKEAVRYPKTKD.EEN.....SLLNQGSKL.....SLQQQKSGR...  
*Coleophoma crateriformis* gb |RDW64025.1| ..TEES.VKEAVRYPKTKD.EEN.....SLLNQGSKL.....SLQQQKSGR...  
*Penicillium rolfsii* gb |KAF3396381.1| ..TEES.VKEAVRYPKTKD.EEN.....SLLNQGSKL.....SLQQQKSGR...  
*Amorphotheca resinae* ref |XP\_024718197.1| ..TEES.VKEAVRYPKTKD.EEN.....SLLNQGSKL.....SLQQQKSGR...  
*Chalara longipes* gb |KAF370763.1| ..TEES.VKEAVRYPKTKD.EEN.....SLLNQGSKL.....SLQQQKSGR...  
*Aspergillus terreus* gb |KAG2412800.1| ..TEES.VKEAVRYPKTKD.EEN.....SLLNQGSKL.....SLQQQKSGR...  
*Aspergillus mulundensis* ref |XP\_026603423.1| ..TEES.VKEAVRYPKTKD.EEN.....SLLNQGSKL.....SLQQQKSGR...  
*Hyaloscypha variabilis* gb |PMD46603.1| ..TEES.VKEAVRYPKTKD.EEN.....SLLNQGSKL.....SLQQQKSGR...  
*Talaromyces marneffei* ref |XP\_002145444.1| ..TEES.VKEAVRYPKTKD.EEN.....SLLNQGSKL.....SLQQQKSGR...  
*Aspergillus phoenicis* gb |RDK39989.1| ..TEES.VKEAVRYPKTKD.EEN.....SLLNQGSKL.....SLQQQKSGR...  
*Aspergillus niger* ref |XP\_001398292.1| ..TEES.VKEAVRYPKTKD.EEN.....SLLNQGSKL.....SLQQQKSGR...  
*Trichodelia bispurula* gb |KAF2400853.1| ..TEES.VKEAVRYPKTKD.EEN.....SLLNQGSKL.....SLQQQKSGR...



5



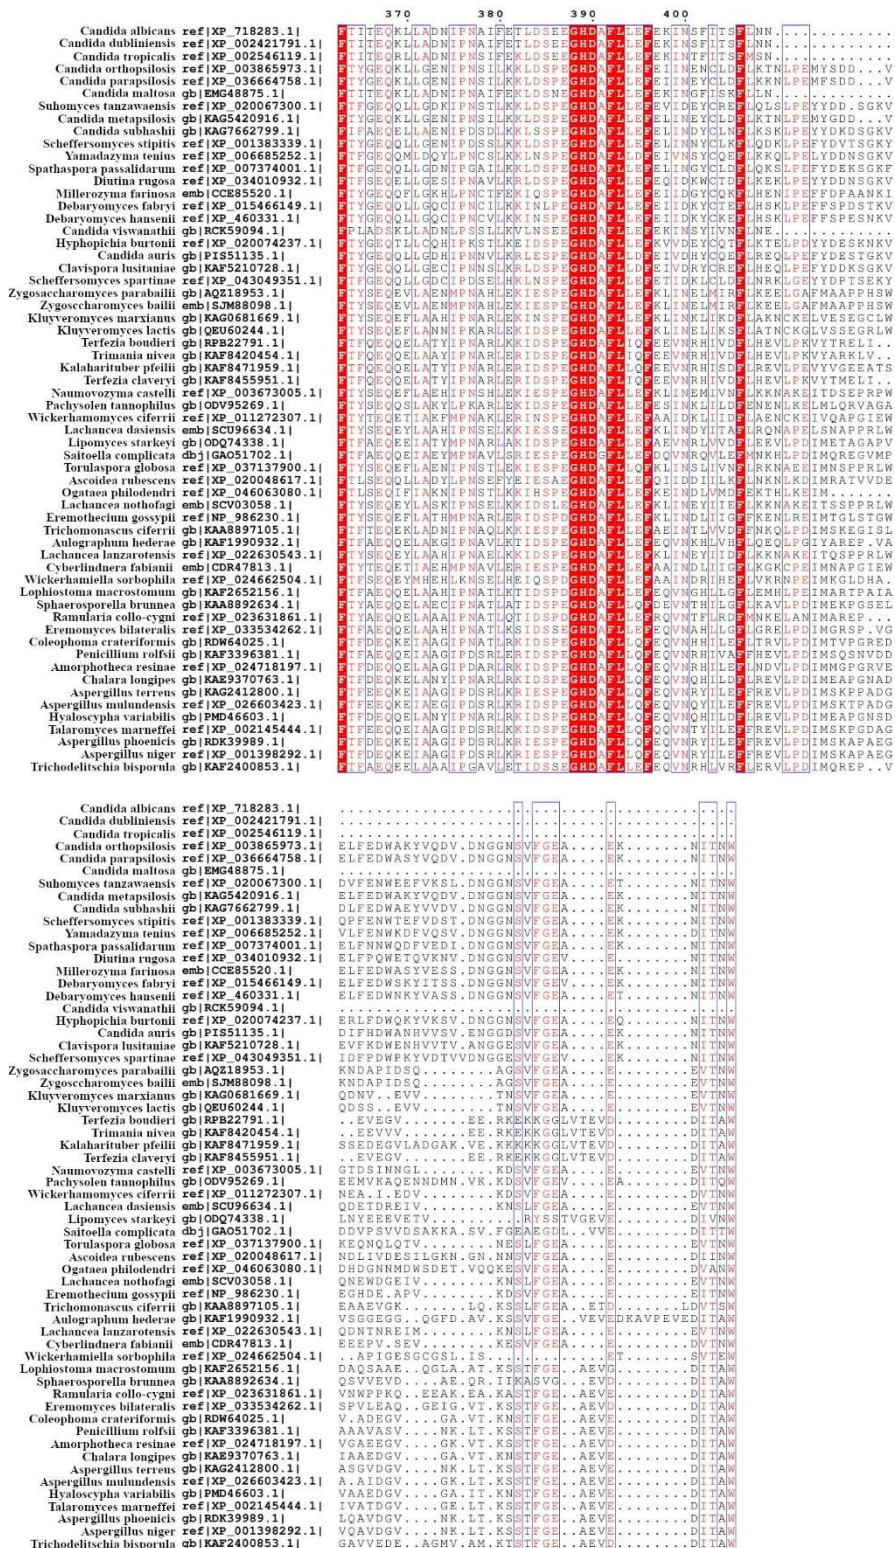

**Figure S1.** The multiple sequence alignment of amino acid sequences from 60 microorganisms from the Ascomycota group to the C. albicans Met2 amino acid sequence from C. albicans. Analysis performed using BLAST program [1].

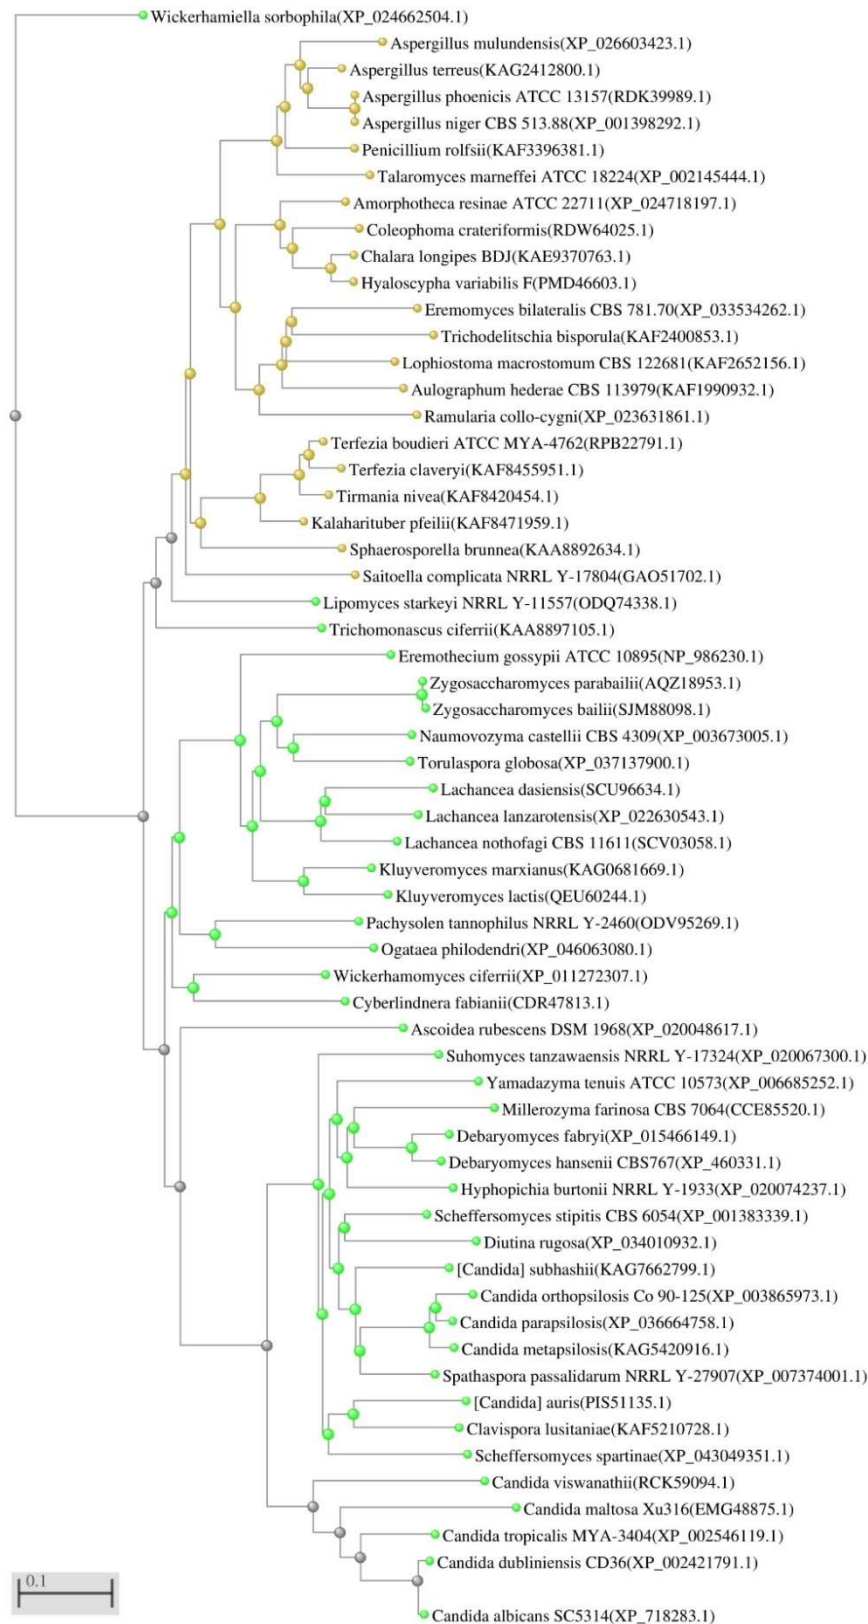

**Figure S2.** Phylogenetic tree of amino acid sequences from 60 microorganisms from the Ascomycota group with high similarity ( $\geq 50.34$  % of identity) to the Met2 amino acid sequence from *C. albicans*. Analysis performed using BLAST program [1].

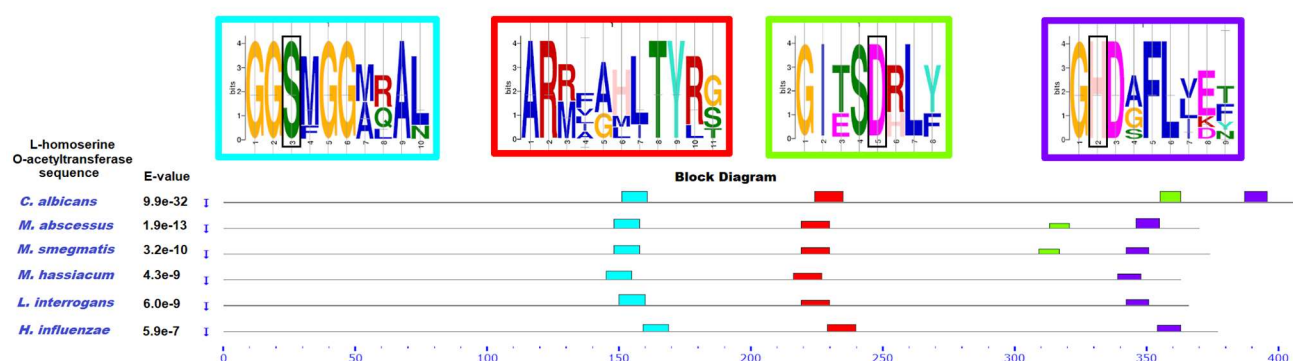

**Figure S3.** Conservation of characteristic amino acid motifs in L-homoserine O-acetyltransferase sequences. The catalytic triad residues are marked with a black frame. The analysis was performed using MAST , FIMO and TOMTOM tools from The MEME suite [2-4].

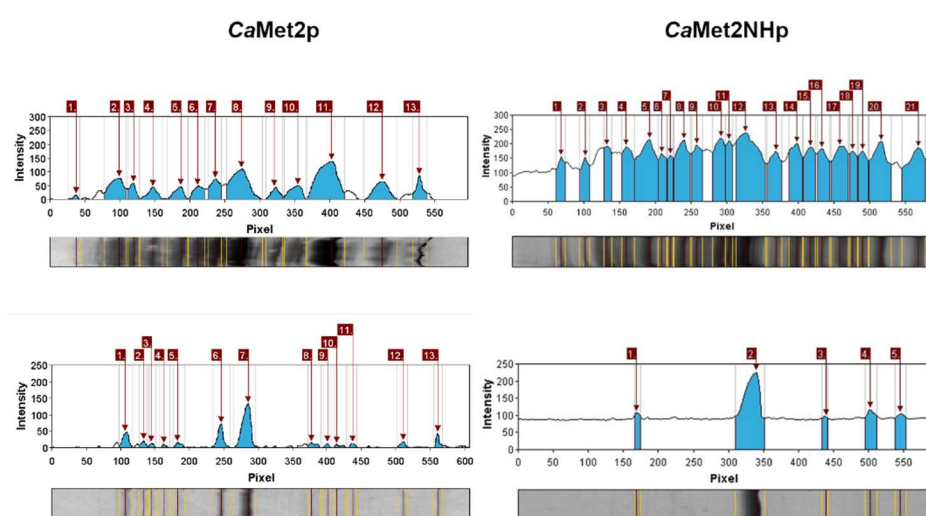

(a)

| Protein name                            | CaMet2p                   | CaMet2NHp                 |
|-----------------------------------------|---------------------------|---------------------------|
| Total amount of protein in cell extract | 100 %                     | 100%                      |
| Rate of protein expression              | 23 %                      | 19 %                      |
| Volume of purified protein              | 10 mL                     | 10 mL                     |
| Concentration of recombinant protein    | 0.114 mg mL <sup>-1</sup> | 0.237 mg mL <sup>-1</sup> |
| Purity of recombinant protein           | 44 %                      | 86 %                      |

(b)

| Protein name                                      | CaMet2p  | CaMet2NHp |
|---------------------------------------------------|----------|-----------|
| Theoretical molecular mass                        | 45.4 kDa | 46.2 kDa  |
| Calculated molecular mass after SDS-PAGE analysis | 45.0 kDa | 46.6 kDa  |

(c)

**Figure S4.** Overproduction of *CaMet2p* and *CaMet2NHp* in *E. coli* cells: (a) Densitometric analysis of SDS-PAGE electrophoresis analysis of cell extract (top) and purified fraction (bottom) from *E. coli* cells producing *CaMet2p* and *CaMet2NHp* recombinant protein. Gel Analyzer software [5]; (b) Mass balance of *CaMet2p* and *CaMet2NHp* purification developed on the base of the Gel Analyzer Program analysis results and experimental work; (c) Theoretical molecular mass (ProtParam analysis [6]) and determined by SDS-PAGE analysis molecular mass of the *CaMet2p* and *CaMet2NHp*.



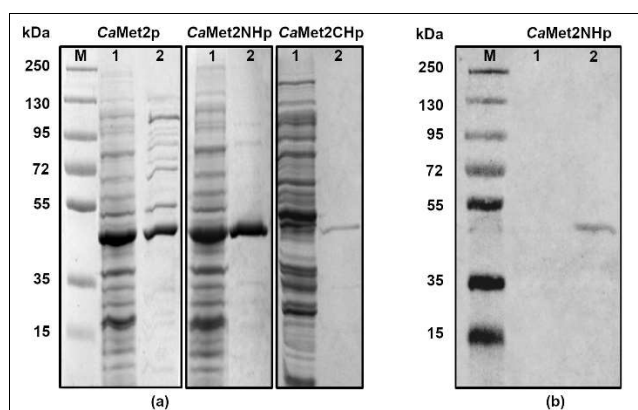

**Figure S5.** (a) SDS-PAGE analysis of CaMet2p, CaMet2NHp and CaMet2CHp overproduction in *E. coli* cells and purification. Plus Prestained Protein Ladder (M), cell-free extract (1), CaMet2p-containing fraction (2) (b) Western blot analysis of CaMet2NHp overproduction. (1) no IPTG induction, (2) IPTG induced.

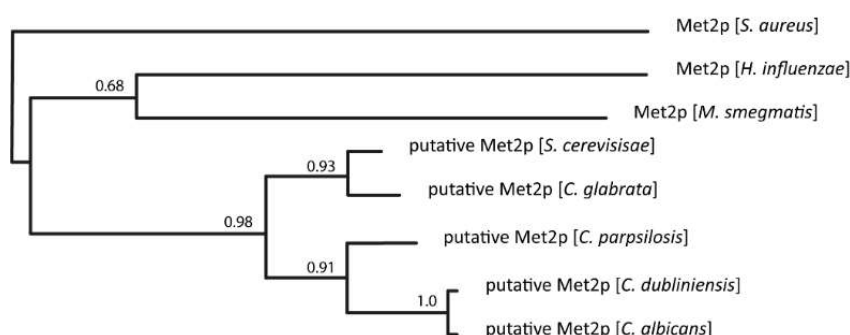

**Figure S6.** Phylogenetic tree of Met2p from various organisms. Analysis performed using BLAST program [1].

## References

1. Altschul, S.F.; Gish, W.; Miller, W.; Myers, E.W.; Lipman, D.J. Basic local alignment search tool. *J. Mol. Biol.* **1990**, *215*, 403–410, doi:10.1016/S0022-2836(05)80360-2.
2. Bailey, T.L.; Gribskov, M. Combining evidence using p-values: Application to sequence homology searches. *Bioinformatics* **1998**, *14*, 48–54, doi:10.1093/bioinformatics/14.1.48.
3. Gupta, S.; Stamatoyannopoulos, J.A.; Bailey, T.L.; Noble, W. Quantifying similarity between motifs. *Genome Biol.* **2007**, *8*, R24, doi:10.1186/gb-2007-8-2-r24.
4. Grant, C.E.; Bailey, T.L.; Noble, W.S. FIMO: scanning for occurrences of a given motif. *Bioinformatics* **2011**, *27*, 1017–1018, doi:10.1093/bioinformatics/btr064.
5. Lazar Jr., I.; Lazar Sr., I. GelAnalyzer 19.1 ([www.gelanalyzer.com](http://www.gelanalyzer.com)).
6. Gasteiger, E.; Hoogland, C.; Gattiker, A.; Duvaud, S.; Wilkins, M.R.; Appel, R.D.; Bairoch, A. Protein Identification and Analysis Tools on the ExPASy Server. In *The Proteomics Protocols Handbook*; Humana Press, 2005; pp. 571–607.
